# Supplementary material
Source: Royal Society of Chemistry journal article supplement (doi:10.1039/d6lc00301j)
Supplement: d6lc00301j1.pdf [file d6lc00301j1.pdf]

# Droplet Microfluidic Profiling of NK Cell Cytotoxicity with Machine Learning-Enabled Target-Cell Death Analysis

Rana S Ozcan<sup>1</sup>, Fatemeh Vahedi<sup>2,3</sup>, Shina Namakian<sup>2,3</sup>, Ali A Ashkar<sup>\*2,3</sup>, Tohid F Didar<sup>\*1</sup>

<sup>1</sup>School of Biomedical Engineering, McMaster University, Hamilton, Ontario, Canada L8S 4L7; <sup>2</sup>McMaster Immunology Research Center, Department of Medicine, McMaster University, Hamilton, Ontario, Canada L8N 3Z5; <sup>3</sup>Centre for Discovery in Cancer Research, McMaster University, Hamilton, Ontario, Canada L8S 4M1

\*Corresponding author: [didar@mcmaster.ca](mailto:didar@mcmaster.ca); [ashkara@mcmaster.ca](mailto:ashkara@mcmaster.ca)

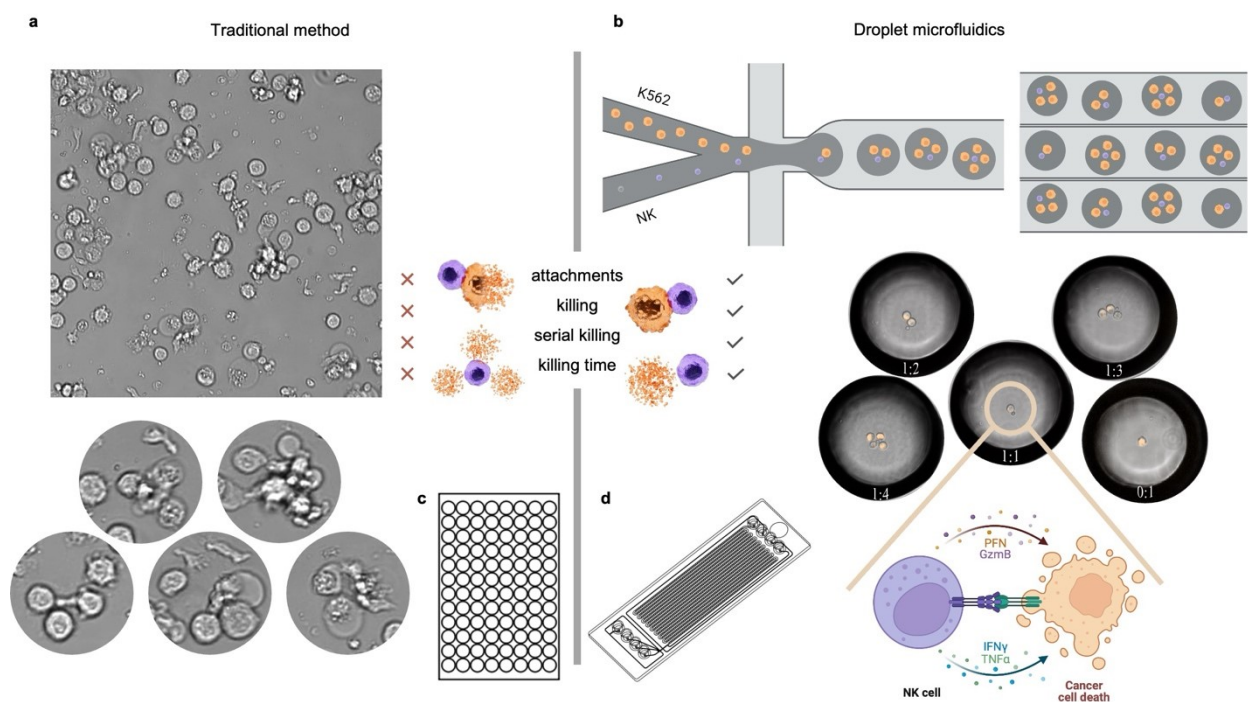

**Supporting Figure 1: Comparative analysis of NK cell cytotoxicity assessment methods.** (a) The traditional method of using a bulk culture of effector and target cells with uncontrolled interactions and outcomes (b) Schematic of the droplet microfluidic method and corresponding droplet images illustrating the encapsulation and precise control of E:T cell ratios, enabling targeted observations of cytotoxic activity, serial killing, and secretions (c) Image of a well plate used in conventional bulk cytotoxicity assays (d) Image of Microfluidic ChipShop's Fluidic 719 Chip used for droplet generation and storage. Created with BioRender.com.

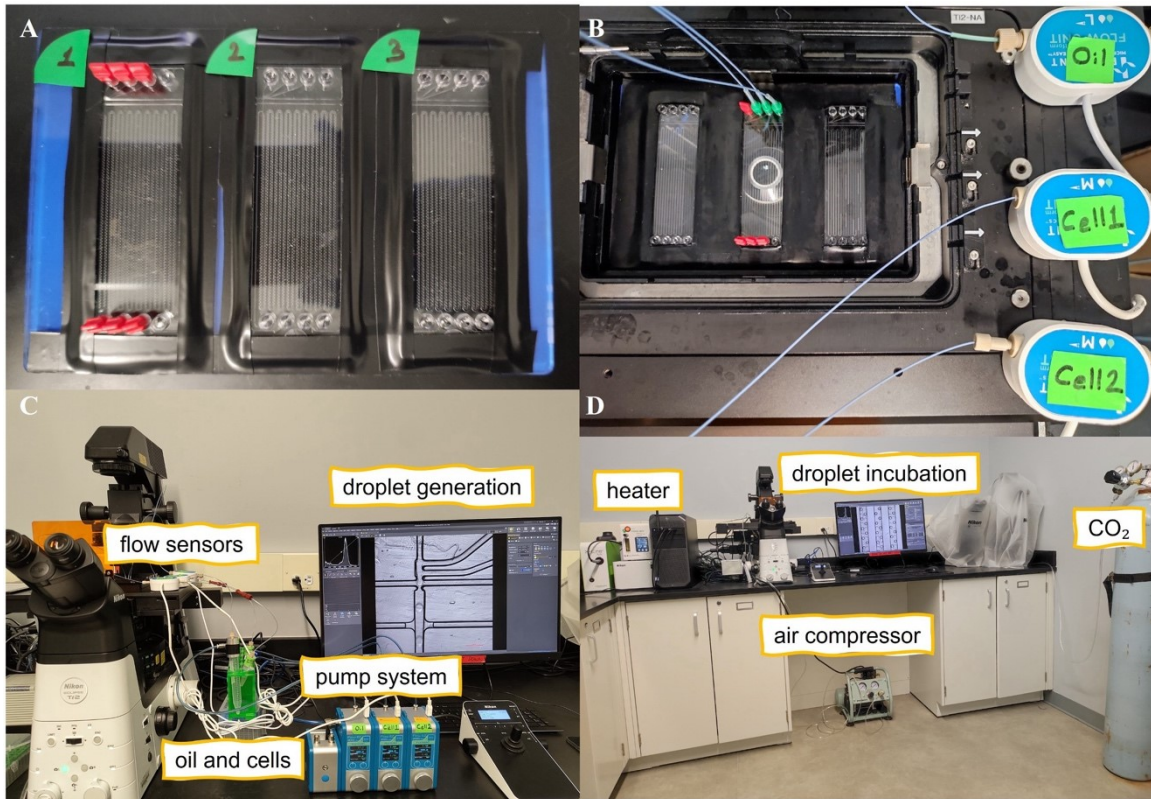

**Supporting Figure 2: Droplet generation and capturing with Fluidic 719 chip.** (a) Three Fluidics719 droplet-generation/storage chips loaded in parallel for simultaneous processing. (b) A single chip mounted in the Fluigent flow sensors, with inlet tubing for oil and cell suspensions. (c) Droplet-generation workstation featuring a Nikon Eclipse Ti2-E inverted microscope, Fluigent FlowEZ pump system, and inline flow sensors, with reservoirs for dSurf oil and cell suspensions. (d) Droplet-incubation bench showing the heated microscope enclosure and CO<sub>2</sub> cylinder used to maintain 37 °C and 5% CO<sub>2</sub> during time-lapse imaging.

### Blood Collection from Donors

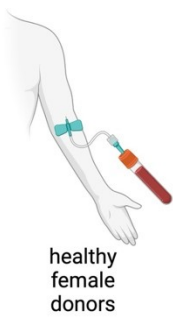

NK Cell Isolation

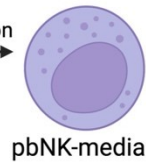

tumor-derived soluble factors

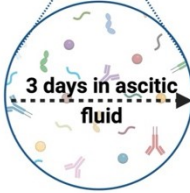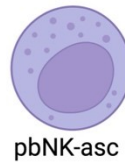

K562-mb-IL21 feeder cells and IL-2 cytokine

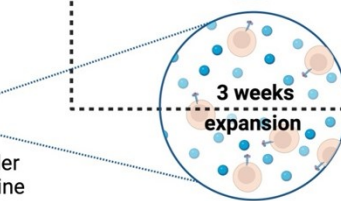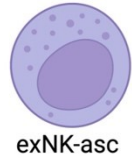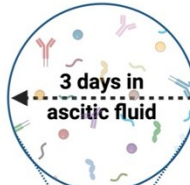

tumor-derived soluble factors

### Ascites Fluid Collection from Patients

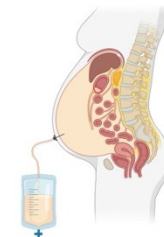

Cell Elimination

cell-free malignant ascites fluid

**Supporting Figure 3: Illustration of the workflow for NK cell preparation.** NK cells are first isolated from the blood of healthy female donors. Cell-free malignant ascites fluid is collected from patients with ovarian cancer, representing the tumor-derived soluble factors that simulate the tumor microenvironment. Primary NK cells (pbNK-media) are cultured in ascites fluid for 3 days (pbNK-asc). In parallel, NK cells undergo a 3-week expansion using K562-mb-IL21 feeder cells and IL-2 cytokine to generate expanded NK cells (exNK-media). Expanded NK cells (exNK-asc) are also exposed to the ascites fluid for 3 days. Created with BioRender.com.

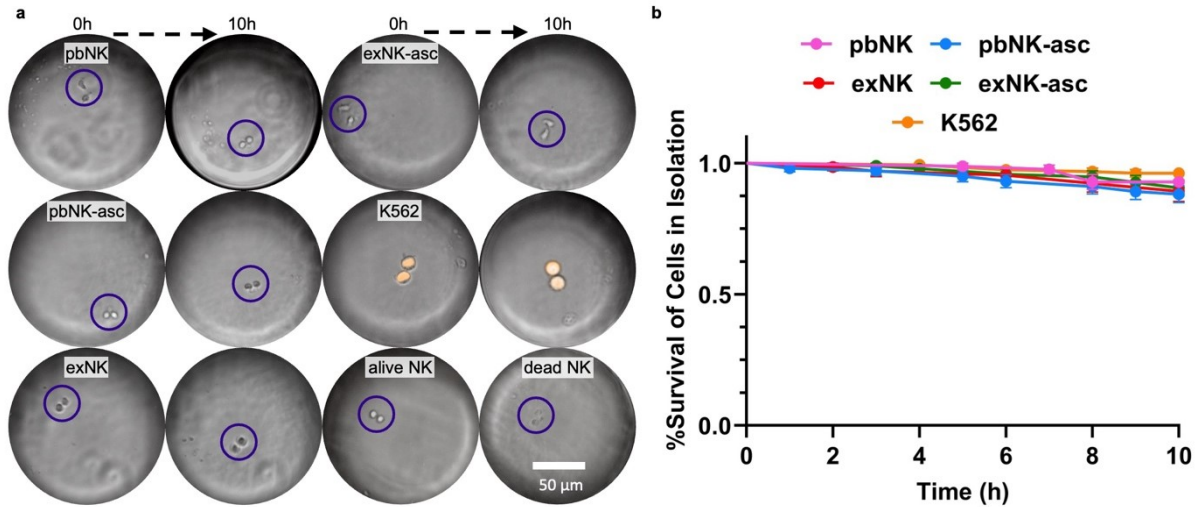

**Supporting Figure 4: Single-Cell Viability Validation.** (a) Single-cell viability controls in isolation. Representative microscopic images of individual NK cells (pbNK, pbNK-asc, exNK, exNK-asc) and K562 cells encapsulated alone in droplets at 0 h and 10 h. Purple circles indicate NK cell locations. Bottom right: examples of viable versus dead NK cell morphology showing characteristic morphological changes associated with cell death. Scale bar, 50  $\mu$ m. (b) Ten-hour survival curves of cells in isolation demonstrating minimal spontaneous death in droplet environment. Lines represent different cell types: pbNK (n=83), pbNK-asc (n=101), exNK (n=65), exNK-asc (n=95), and K562 (n=156). n denotes individual single-cells across three biological replicates. Error bars represent SEM.

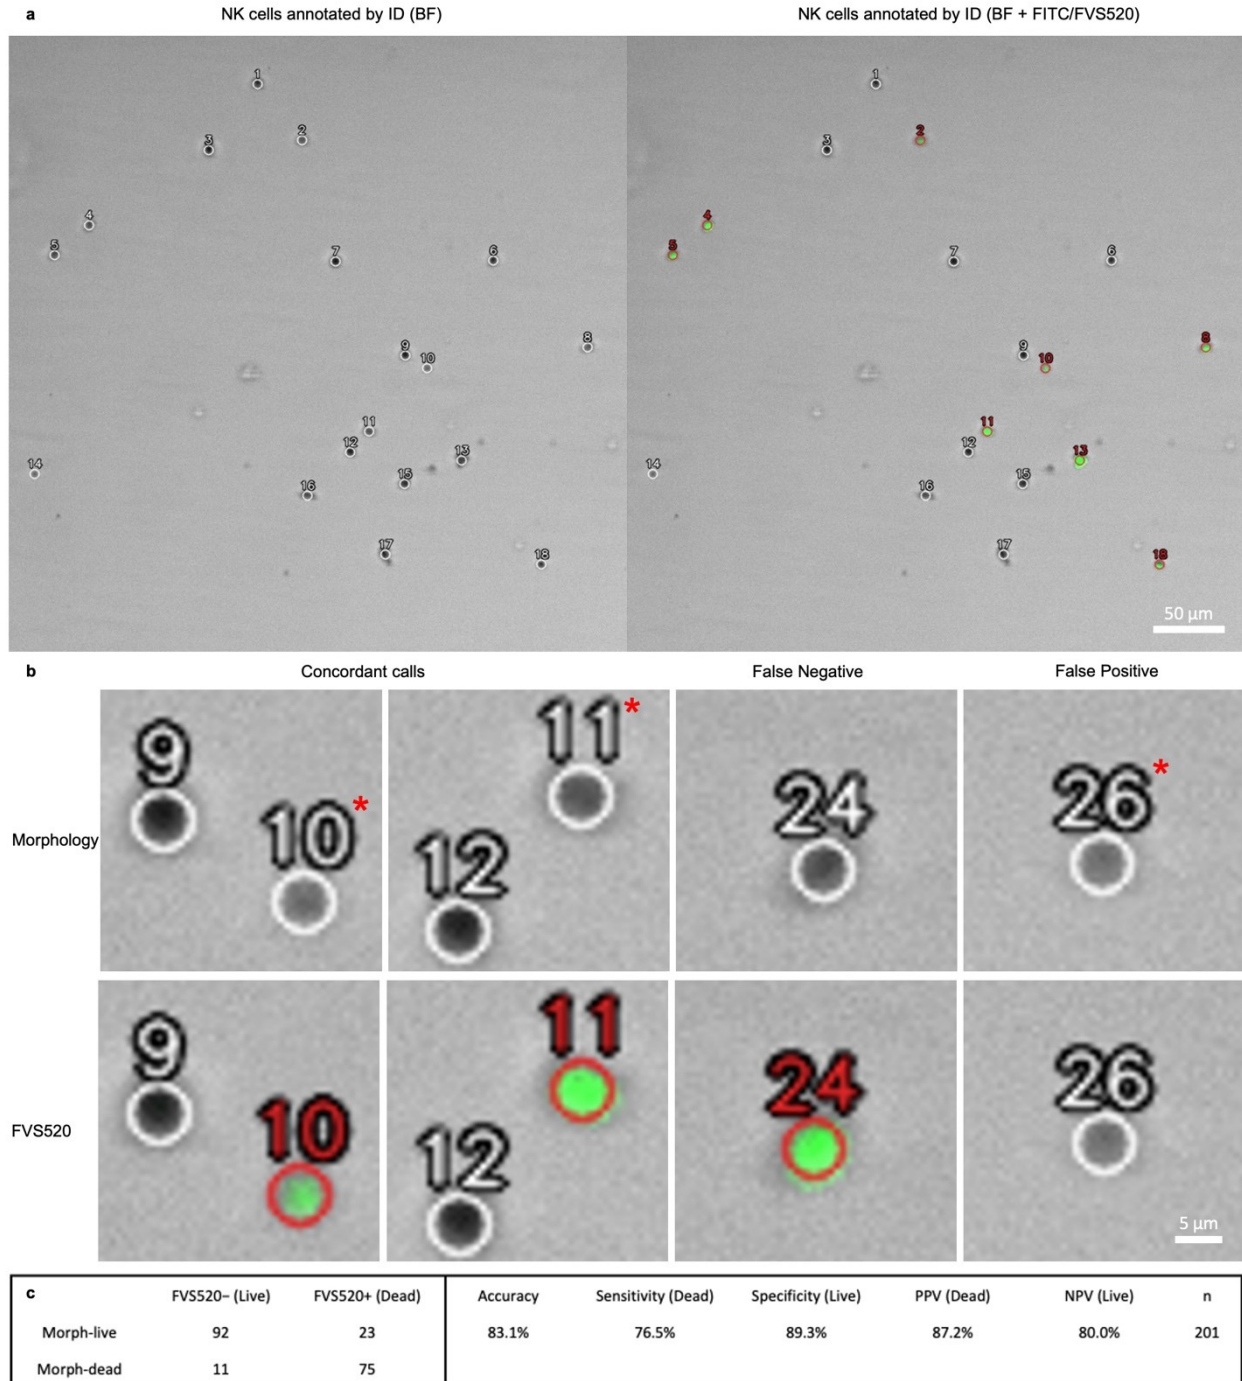

**Supporting Figure 5: Orthogonal validation of morphology-based NK viability scoring using FVS520 live/dead staining.** (a) Representative brightfield (BF) field of NK cells annotated by cell ID (left) and the corresponding BF image overlaid with FITC/FVS520 signal (right). The BF image was used for morphology-based viability scoring, and compared to the corresponding FVS520 dye status in the matched overlay image. FVS520 fluorescence (green) indicates membrane-compromised (non-viable) cells. Scale bar: 50  $\mu\text{m}$ . (b) Example single-cell comparisons between morphology-based calls (BF; top) and FVS520 readout (bottom). Asterisks mark cells classified as dead by morphology, and red circles mark FVS520-positive (dead). Representative concordant examples are shown alongside mismatch cases defined relative to FVS520 as the reference standard: false negatives (morphology live, FVS520-positive) and false positives (morphology dead, FVS520-negative). Scale bar: 5  $\mu\text{m}$ . (c) Confusion matrix and performance metrics

comparing morphology-based viability calls to FVS520 status across all analyzed cells ( $n = 201$ ), with FVS520 used as the reference standard (FVS520- = live; FVS520+ = dead). Accuracy denotes overall agreement. Sensitivity (dead) is the fraction of FVS520+ cells correctly classified as dead by morphology ( $TP/(TP+FN)$ ). Specificity (live) is the fraction of FVS520- cells correctly classified as live by morphology ( $TN/(TN+FP)$ ). Positive predictive value (PPV, dead) is the fraction of morphology-dead calls that were FVS520+ ( $TP/(TP+FP)$ ), and negative predictive value (NPV, live) is the fraction of morphology-live calls that were FVS520- ( $TN/(TN+FN)$ ).

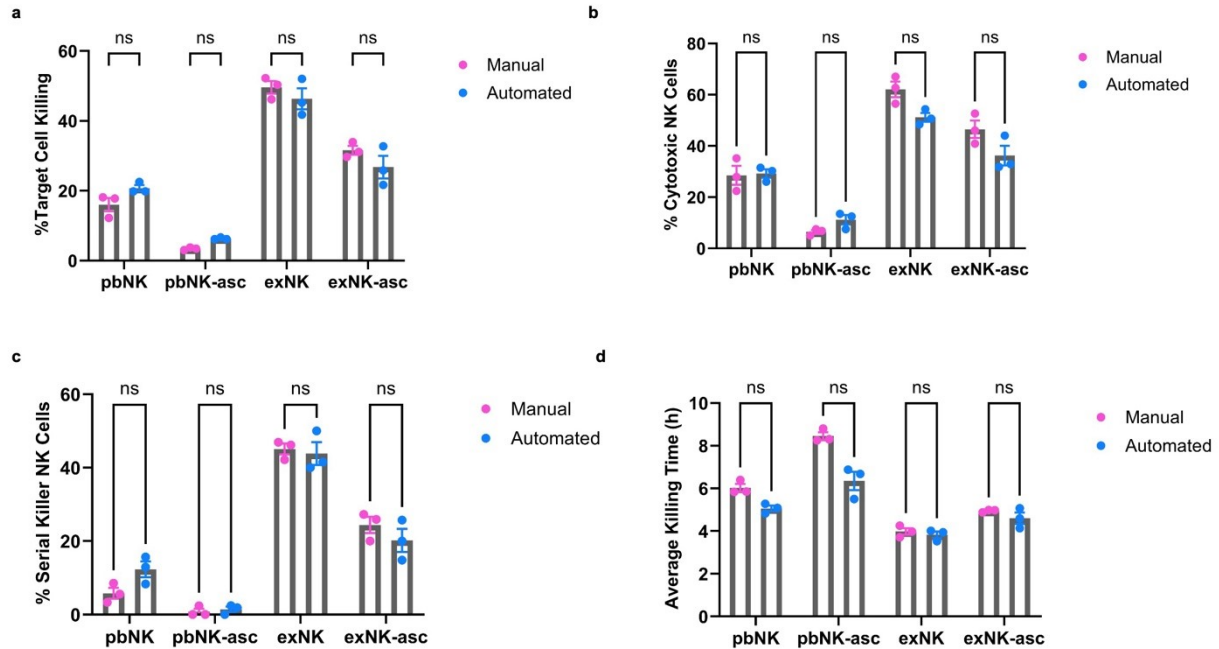

**Supporting Figure 6: Comparison of manual and automated analysis methods for NK cell cytotoxicity assays.** (a) percentage of target cell killing, (b) percentage of cytotoxic NK cells, (c) percentage of serial killer NK cells, and (d) average killing time across different NK cell types (pbNK, pbNK-asc, exNK, exNK-asc). Data represent three independent biological replicates for each condition ( $n = 3$ ), with individual replicate values shown as dots and bars representing mean  $\pm$  SEM. Statistical comparisons were performed using paired  $t$  tests; all comparisons shown were not significant (ns,  $p > 0.05$ ). Underlying sample sizes differed by metric. For panel (a),  $n =$  total target cells; for panel (b),  $n =$  droplets; for panel (c),  $n =$  multi-cell droplets (target cell  $\geq 2$ ); and for panel (d),  $n =$  kill events. Manual and automated sample sizes were: (a) manual 377, 391, 447, 365 and automated 390, 392, 451, 365; (b) manual 189, 193, 215, 170 and automated 190, 194, 216, 170; (c) manual 113, 118, 139, 112 and automated 118, 118, 145, 114; and (d) manual 62, 13, 225, 117 and automated 82, 25, 204, 95 for pbNK, pbNK-asc, exNK, and exNK-asc, respectively.

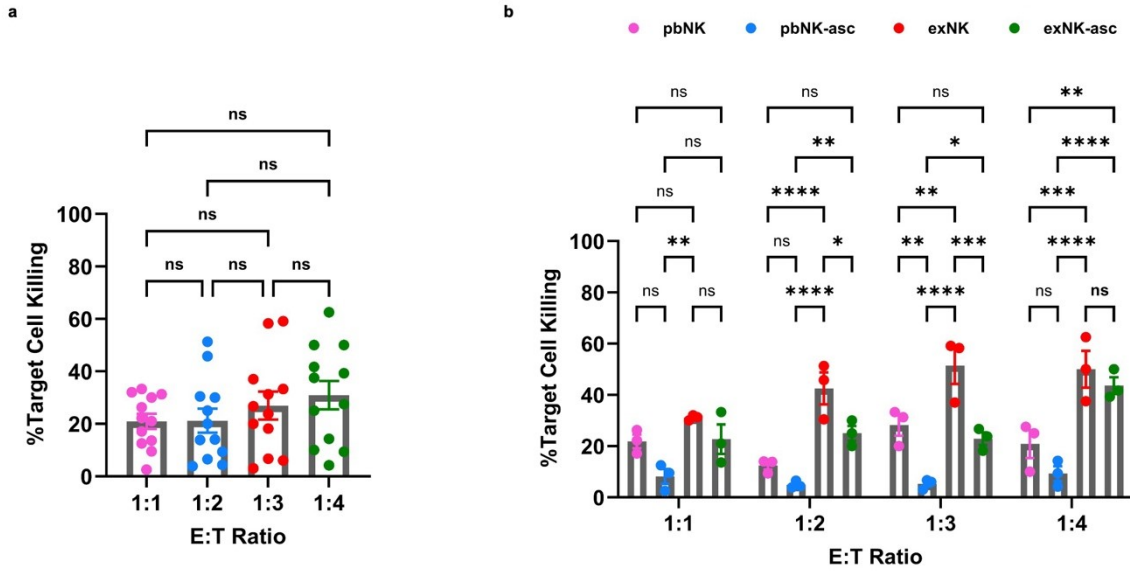

**Supporting Figure 7: Comparison of target cell killing across E:T ratios.** (a) Percentage of target cell killing across different droplet types (E:T ratios ranging from 1:1 to 1:4) regardless of NK cell type. Data represent three independent biological replicates across four NK cell groups ( $n = 12$  plotted values) for each E:T ratio. The underlying sample size is total target cells pooled across all NK groups: 1:1 ( $n = 275$ ), 1:2 ( $n = 480$ ), 1:3 ( $n = 531$ ), and 1:4 ( $n = 312$ ). (b) Percentage of target cell killing by NK cell groups (pbNK, pbNK-asc, exNK, and exNK-asc) across varying droplet types. Data represent three independent biological replicates ( $n = 3$ ) for each condition. The underlying sample size is total target cells within each NK-group/E:T-ratio condition: 1:1, pbNK ( $n = 72$ ), pbNK-asc ( $n = 76$ ), exNK ( $n = 71$ ), exNK-asc ( $n = 56$ ); 1:2, pbNK ( $n = 118$ ), pbNK-asc ( $n = 118$ ), exNK ( $n = 148$ ), exNK-asc ( $n = 96$ ); 1:3, pbNK ( $n = 108$ ), pbNK-asc ( $n = 114$ ), exNK ( $n = 156$ ), exNK-asc ( $n = 153$ ); 1:4, pbNK ( $n = 92$ ), pbNK-asc ( $n = 84$ ), exNK ( $n = 76$ ), exNK-asc ( $n = 60$ ). Asterisks represent "ns" ( $p > 0.05$ ), \* ( $p \leq 0.05$ ), \*\* ( $p \leq 0.01$ ), \*\*\* ( $p \leq 0.001$ ), and \*\*\*\* ( $p \leq 0.0001$ ) from one-way or two-way ANOVA with Tukey's multiple comparisons test. All error bars represent SEM.

a

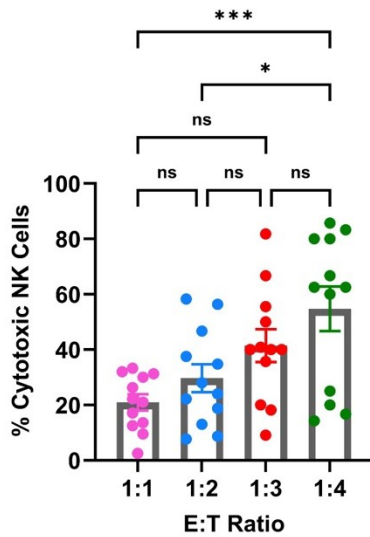

b

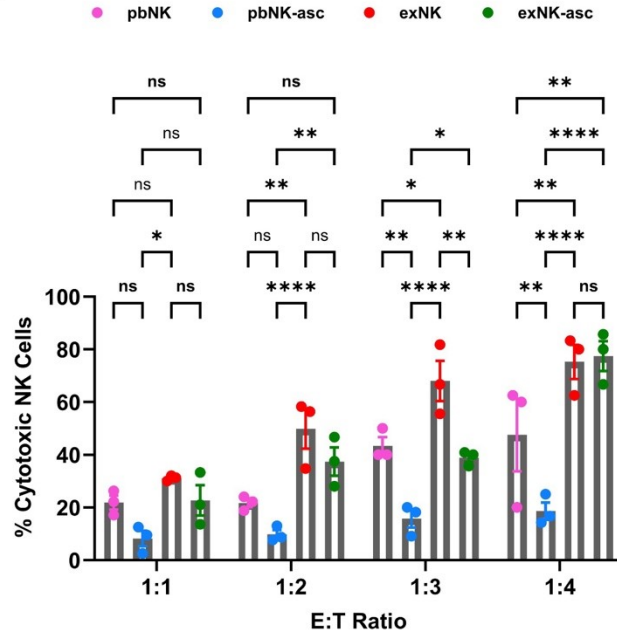

**Supporting Figure 8: Comparison of cytotoxic NK Cells across E:T ratios.** (a) Percentage of cytotoxic NK cells across different droplet types (E:T ratios ranging from 1:1 to 1:4) regardless of NK cell group. Data represent three independent biological replicates across four NK cell groups ( $n = 12$  plotted values) for each E:T ratio. The underlying sample size is the number of droplets pooled across all NK groups: 1:1 ( $n = 275$ ), 1:2 ( $n = 240$ ), 1:3 ( $n = 177$ ), and 1:4 ( $n = 78$ ). (b) Percentage of cytotoxic NK cells by NK cell groups (pbNK, pbNK-asc, exNK, and exNK-asc) across varying droplet types. Data represent three independent biological replicates ( $n = 3$ ) for each condition. The underlying sample size is the number of droplets in each NK-group/E:T-ratio condition: 1:1, pbNK ( $n = 72$ ), pbNK-asc ( $n = 76$ ), exNK ( $n = 71$ ), exNK-asc ( $n = 56$ ); 1:2, pbNK ( $n = 59$ ), pbNK-asc ( $n = 59$ ), exNK ( $n = 74$ ), exNK-asc ( $n = 48$ ); 1:3, pbNK ( $n = 36$ ), pbNK-asc ( $n = 38$ ), exNK ( $n = 52$ ), exNK-asc ( $n = 51$ ); 1:4, pbNK ( $n = 23$ ), pbNK-asc ( $n = 21$ ), exNK ( $n = 19$ ), exNK-asc ( $n = 15$ ). Asterisks represent “ns” ( $p > 0.05$ ), \* ( $p \leq 0.05$ ), \*\* ( $p \leq 0.01$ ), \*\*\* ( $p \leq 0.001$ ), and \*\*\*\* ( $p \leq 0.0001$ ) from one-way or two-way ANOVA with Tukey’s multiple comparisons test. All error bars represent SEM.

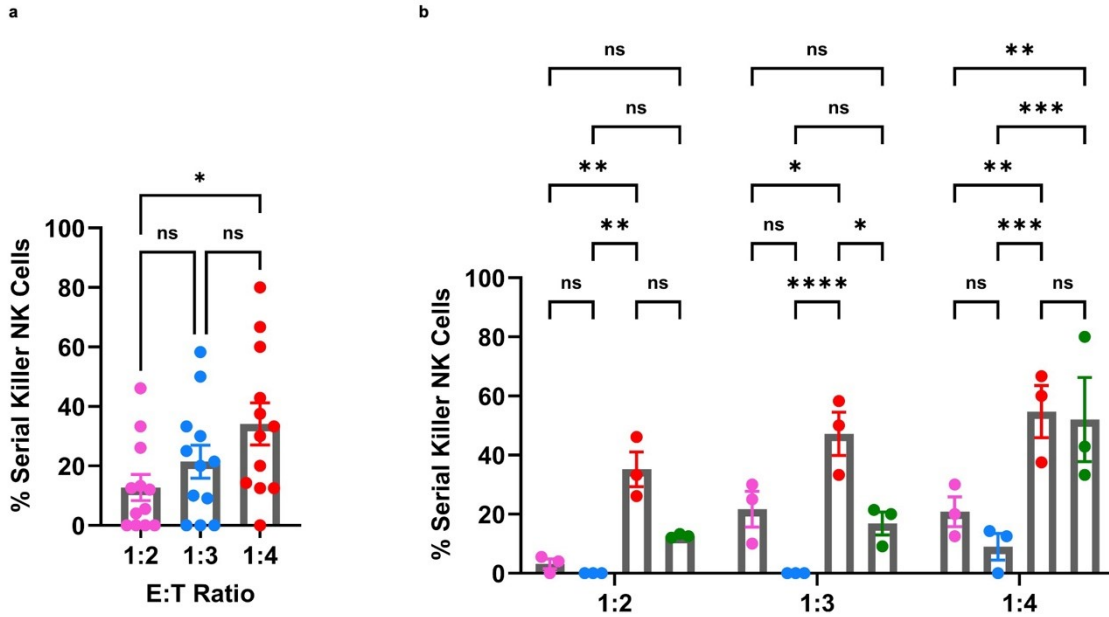

**Supporting Figure 9: Comparison of serial killer NK cells across E:T ratios.** (a) Percentage of serial killer NK cells across different droplet types (E:T ratios 1:2, 1:3, and 1:4) regardless of NK cell group. Data represent three independent biological replicates across four NK cell groups ( $n = 12$  plotted values) for each E:T ratio. The underlying sample size is the number of multi-cell droplets ( $CC \geq 2$ ) pooled across all NK groups: 1:2 ( $n = 240$ ), 1:3 ( $n = 177$ ), and 1:4 ( $n = 78$ ). (b) Percentage of serial killer NK cells by NK cell groups (pbNK, pbNK-asc, exNK, and exNK-asc) across varying droplet types. Data represent three independent biological replicates ( $n = 3$ ) for each condition. The underlying sample size is the number of multi-cell droplets ( $CC \geq 2$ ) in each NK-group/E:T-ratio condition: 1:2, pbNK ( $n = 59$ ), pbNK-asc ( $n = 59$ ), exNK ( $n = 74$ ), exNK-asc ( $n = 48$ ); 1:3, pbNK ( $n = 36$ ), pbNK-asc ( $n = 38$ ), exNK ( $n = 52$ ), exNK-asc ( $n = 51$ ); 1:4, pbNK ( $n = 23$ ), pbNK-asc ( $n = 21$ ), exNK ( $n = 19$ ), exNK-asc ( $n = 15$ ). Statistical significance was determined using one-way or two-way ANOVA with Tukey's multiple comparisons test. Asterisks represent \* ( $p \leq 0.05$ ), \*\* ( $p \leq 0.01$ ), \*\*\* ( $p \leq 0.001$ ), and \*\*\*\* ( $p \leq 0.0001$ ), while ns indicates non-significant comparisons. All error bars represent SEM.



**Supporting Figure 10: Functional heterogeneity of per-NK killing across NK cell states and target cell loads.** (a) Distribution of per-NK kill fraction ( $k/T_0$ ) across all single-NK droplets, where  $k$  is the number of K562 target cells killed by an individual NK cell and  $T_0$  is the initial number of K562 target cells in the droplet, for pbNK ( $n = 190$ ), pbNK-asc ( $n = 194$ ), exNK ( $n = 216$ ), and exNK-asc ( $n = 170$ ). (b-e) Distribution of per-NK kill fraction for droplets containing (b)  $T_0 = 1$ : pbNK ( $n = 72$ ), pbNK-asc ( $n = 76$ ), exNK ( $n = 71$ ), exNK-asc ( $n = 56$ ); (c)  $T_0 = 2$ : pbNK ( $n = 59$ ), pbNK-asc ( $n = 59$ ), exNK ( $n = 74$ ), exNK-asc ( $n = 48$ ); (d)  $T_0 = 3$ : pbNK ( $n = 36$ ), pbNK-asc ( $n = 38$ ), exNK ( $n = 52$ ), exNK-asc ( $n = 51$ ); and (e)  $T_0 = 4$ : pbNK ( $n = 23$ ), pbNK-asc ( $n = 21$ ), exNK ( $n = 19$ ), exNK-asc ( $n = 15$ ).  $n$  denotes individual single-NK droplets pooled across three biological replicates. Asterisks represent “ns” ( $p > 0.05$ ), \* ( $p \leq 0.05$ ), \*\* ( $p \leq 0.01$ ), \*\*\* ( $p \leq 0.001$ ), and \*\*\*\* ( $p \leq 0.0001$ ) from one-way ANOVA with Tukey’s multiple comparisons test. All error bars represent SEM.

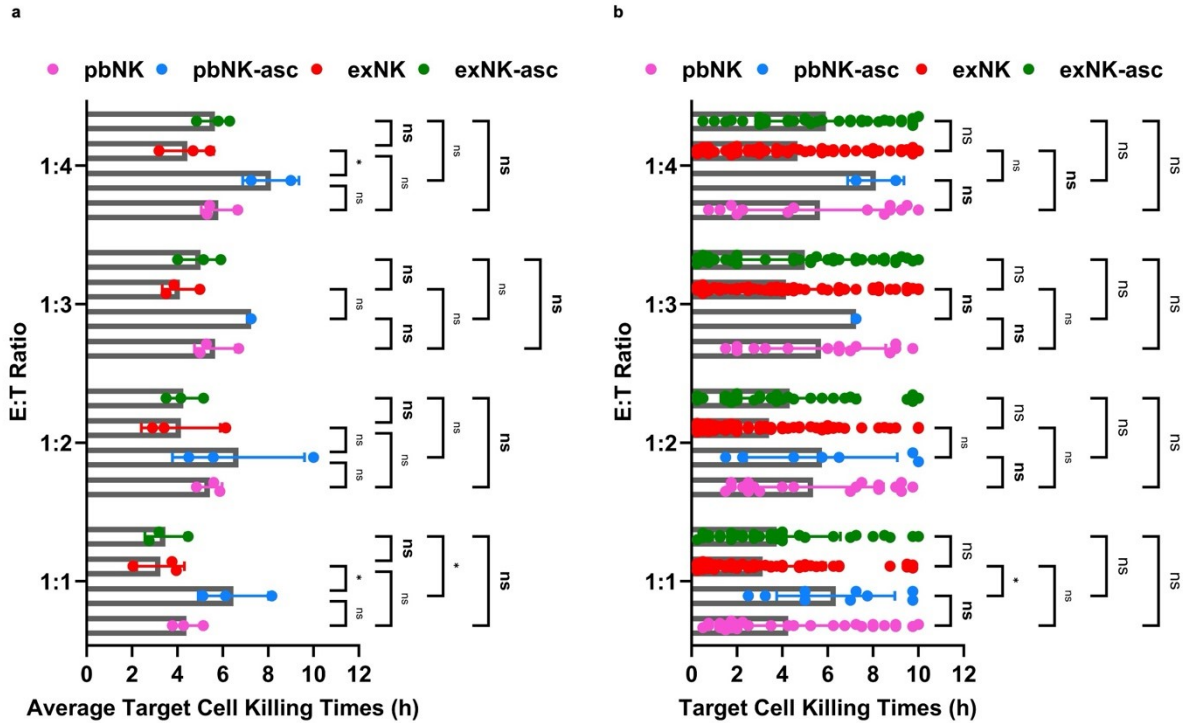

**Supporting Figure 11: Comparison of target cell killing times across NK cells and E:T ratios.** (a) Average target-cell killing times for different NK-cell groups (pbNK, pbNK-asc, exNK, and exNK-asc) across varying droplet types (E:T ratios ranging from 1:1 to 1:4). Data represent three independent biological replicates ( $n = 3$ ) for each condition. The underlying sample size is the number of kill events pooled across all NK groups: 1:1 ( $n = 54$ ), 1:2 ( $n = 109$ ), 1:3 ( $n = 151$ ), and 1:4 ( $n = 92$ ). (b) Distribution of individual target-cell killing times for each NK-cell group across E:T ratios. The underlying sample size is the number of kill events in each NK-group/E:T-ratio condition: 1:1, pbNK ( $n = 15$ ), pbNK-asc ( $n = 5$ ), exNK ( $n = 22$ ), exNK-asc ( $n = 12$ ); 1:2, pbNK ( $n = 15$ ), pbNK-asc ( $n = 6$ ), exNK ( $n = 65$ ), exNK-asc ( $n = 23$ ); 1:3, pbNK ( $n = 31$ ), pbNK-asc ( $n = 6$ ), exNK ( $n = 80$ ), exNK-asc ( $n = 34$ ); 1:4, pbNK ( $n = 21$ ), pbNK-asc ( $n = 8$ ), exNK ( $n = 37$ ), exNK-asc ( $n = 26$ ). Asterisks represent “ns” ( $p > 0.05$ ), \* ( $p \leq 0.05$ ), \*\* ( $p \leq 0.01$ ), \*\*\* ( $p \leq 0.001$ ), and \*\*\*\* ( $p \leq 0.0001$ ) from one-way or two-way ANOVA with Tukey’s multiple comparisons test. All error bars represent SEM.

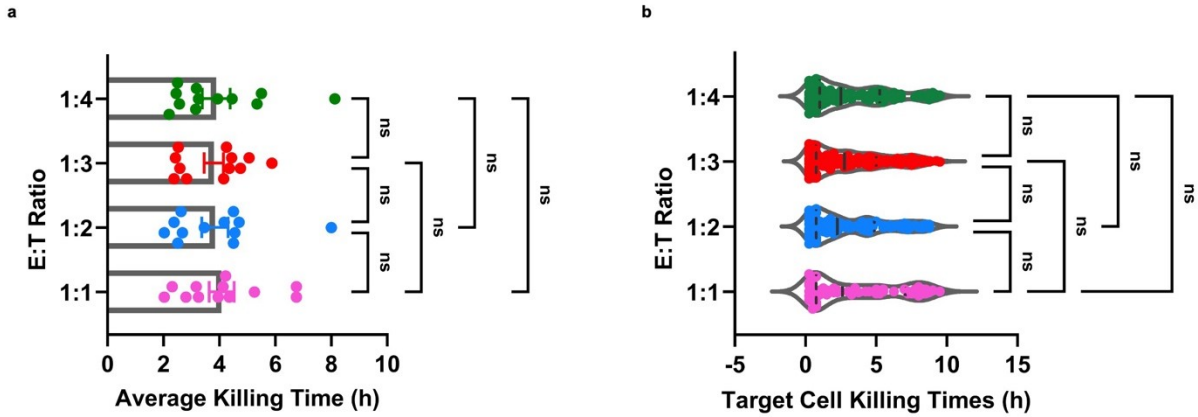

**Supplementary Figure 12: Comparison of target cell killing times across E:T ratios.** (a) Average target-cell killing times across different droplet types (E:T ratios ranging from 1:1 to 1:4) for all NK cell groups combined. Data represent three independent biological replicates across four NK cell groups ( $n = 12$  plotted values) for each E:T ratio. The underlying sample size is the number of kill events pooled across all NK groups: 1:1 ( $n = 54$ ), 1:2 ( $n = 109$ ), 1:3 ( $n = 151$ ), and 1:4 ( $n = 92$ ). (b) Distribution of individual target-cell killing times across varying E:T ratios. The underlying sample size is the number of kill events pooled across all NK groups: 1:1 ( $n = 54$ ), 1:2 ( $n = 109$ ), 1:3 ( $n = 151$ ), and 1:4 ( $n = 92$ ). Asterisks represent “ns” ( $p > 0.05$ ), \* ( $p \leq 0.05$ ), \*\* ( $p \leq 0.01$ ), \*\*\* ( $p \leq 0.001$ ), and \*\*\*\* ( $p \leq 0.0001$ ) from one-way or two-way ANOVA with Tukey’s multiple comparisons test. All error bars represent SEM.

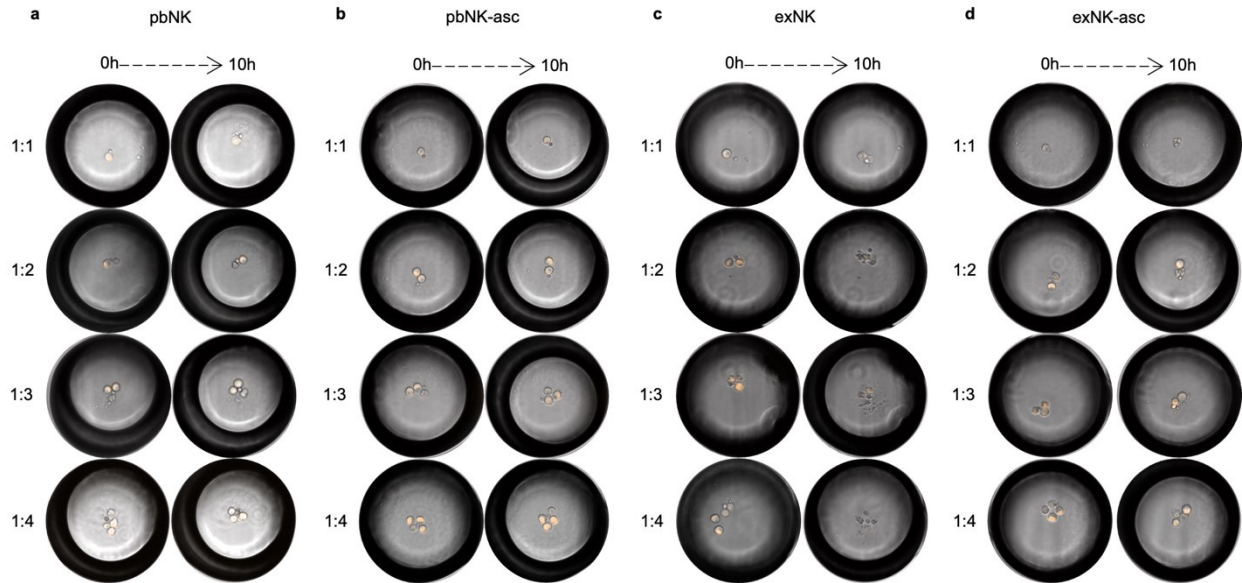

**Supplementary Figure 13: Time-Lapse images of NK cell-mediated cytotoxicity in microfluidic droplets.** Illustration of the interaction dynamics of (a) pbNK, (b) pbNK-asc, (c) exNK and (d) exNK-asc cells with K562 over 10 hours at various E:T ratios, highlighting differences in cytotoxic engagement and the impact of cell conditioning on NK cell activity.
